# Supplementary material for: V-ATPase is a universal regulator of LC3-associated phagocytosis and non-canonical autophagy
Source: PubMed Central journal article supplement (PMC9082624; doi:10.1083/jcb.202105112), 2022-05-05

### Source Data Figure 6

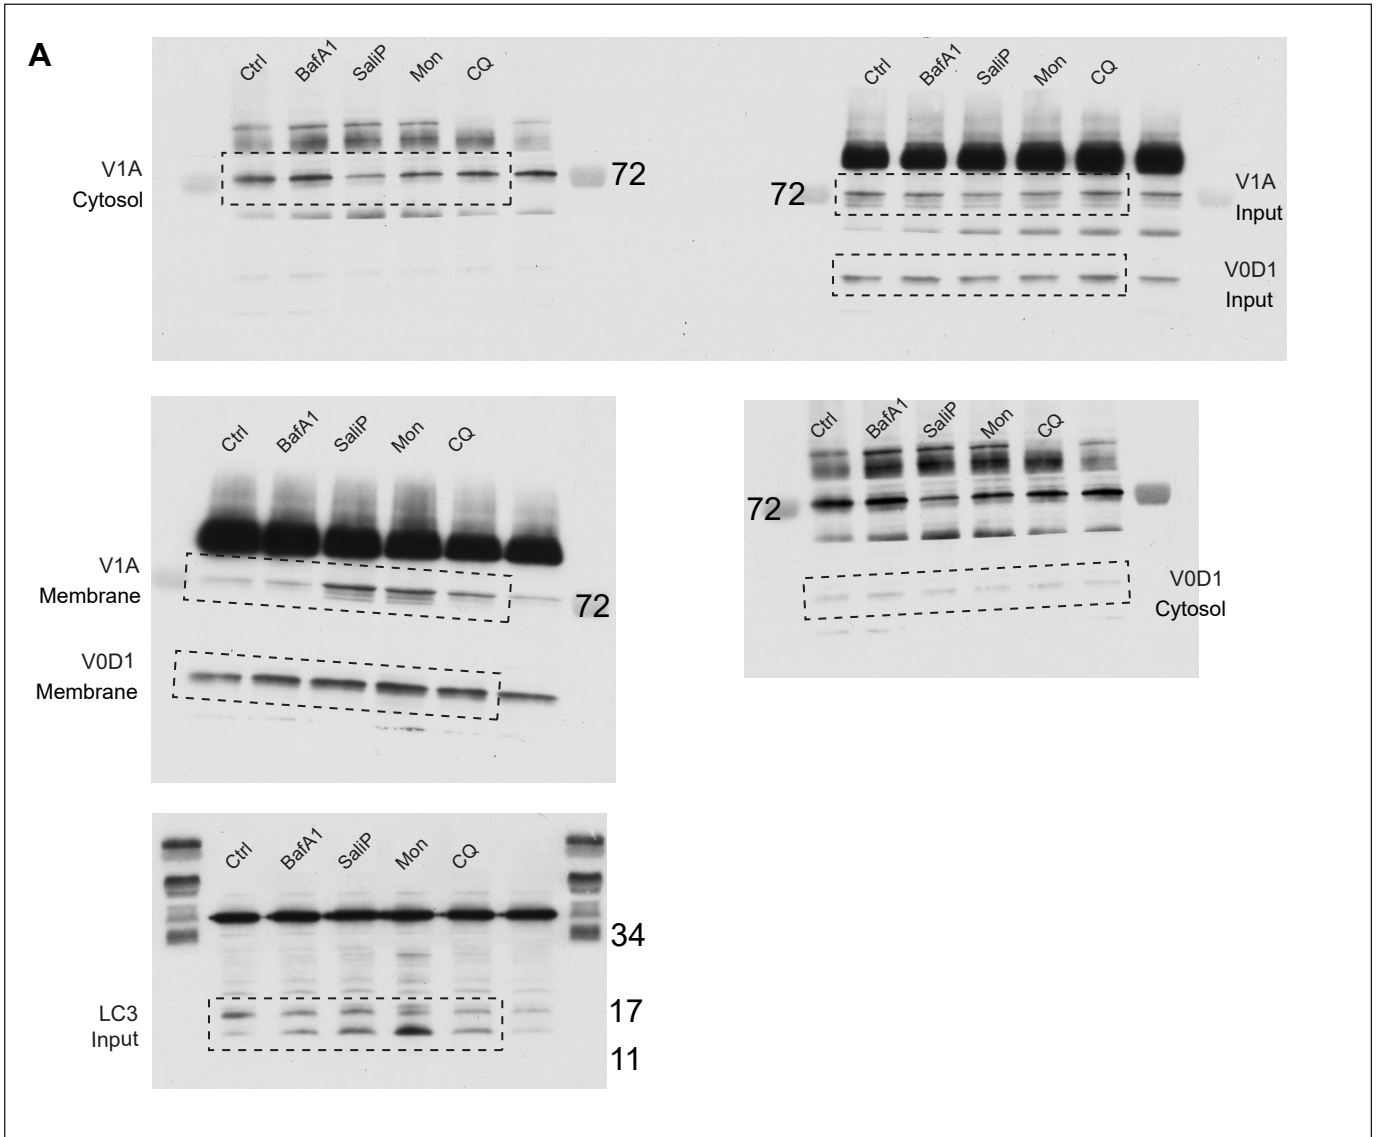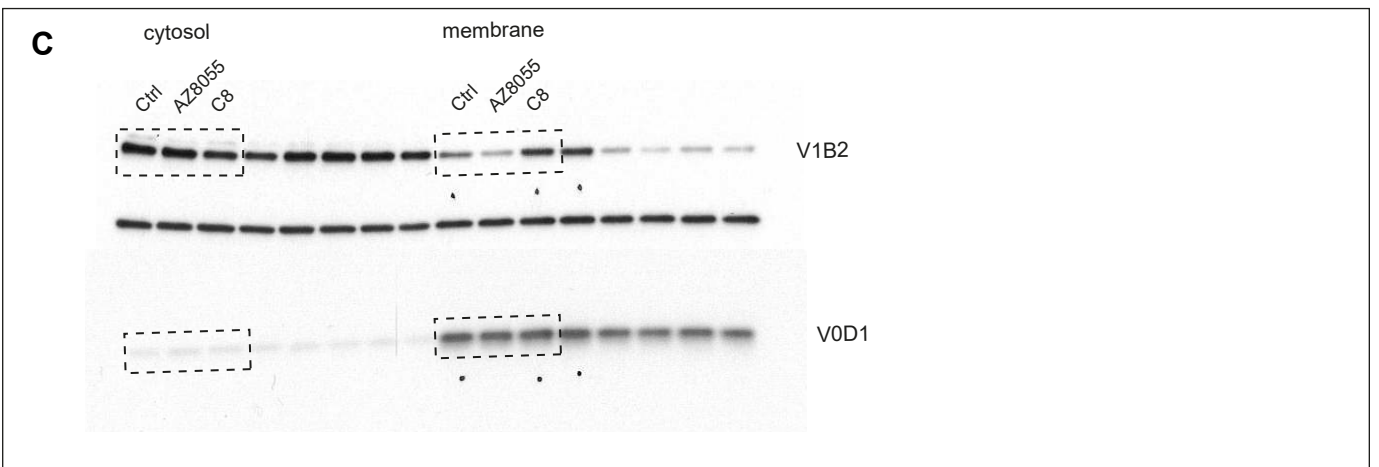

Supplement: JCB_202105112_SourceDataF6.pdf [file JCB_202105112_SourceDataF6.pdf]
